# Supplementary material
Source: Springer Nature journal article supplement (https://www.springermedizin.de/resource/supplementary/12879_2012_2410_MOESM1_ESM.pdf/9444516)

### a) Opportunity for HIV test proposal based on high-risk group of acquiring HIV

Fate of MSM upon first contact with a healthcare setting within the 3-year to 3-month period prior to diagnosis of HIV  
MSM who reported no possible HIV-related symptom during the period

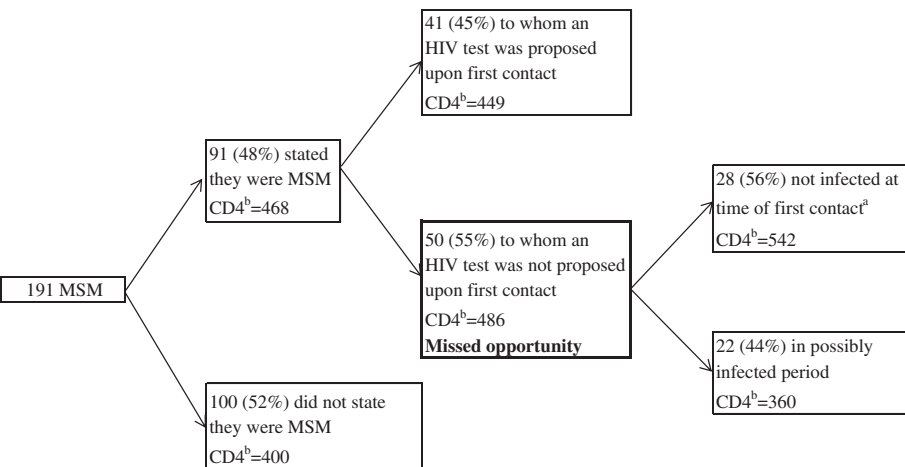

### b) Opportunity for HIV test proposal based on possible HIV-related condition

Fate of patients seeking care for possible HIV-related symptoms upon first contact with a healthcare setting within the 3-year to 3-month period prior to HIV diagnosis

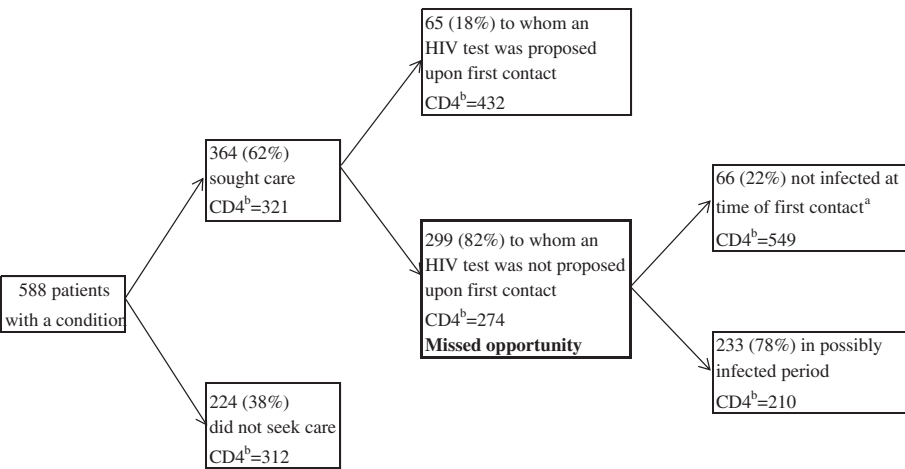

Supplement: MOESM1 [file 9444516]
